# Supplementary material for: The discovery of a novel inhibitor of apoptotic protease activating factor-1 (Apaf-1) for ischemic heart: synthesis, activity and target identification
Source: PubMed Central journal article supplement (PMC4957240; doi:10.1038/srep29820), 2016-07-22

## Supporting Information

### **The discovery of a novel inhibitor of apoptotic protease activating factor-1 (Apaf-1) for ischemic heart: synthesis, activity and target identification**

Ying Wang<sup>a</sup>, Yang Cao<sup>b</sup>, Qing Zhu<sup>c</sup>, Xianfeng Gu<sup>b\*</sup>, Yi-Zhun Zhu<sup>a,d\*</sup>

<sup>a</sup> Department of Pharmacology, School of Pharmacy and Institute of Biomedical Sciences, Fudan University, Shanghai 201203, China

<sup>b</sup> Department of Medicinal Chemistry, School of Pharmacy, Fudan University, Shanghai 201203, China

<sup>c</sup> School of Pharmacy, Nantong University, Nantong, 226001, China

<sup>d</sup>Department of Pharmacology, LYY <sup>f</sup>School of Medicine, National University of Singapore

#### Table of contents

|                                                                                                                         |    |
|-------------------------------------------------------------------------------------------------------------------------|----|
| Table S1. The predicted target candidates for kinases of compound ZYZ-488 using PharmMapper server <sup>[1]</sup> ..... | 1  |
| Figure S1. <sup>1</sup> H NMR(600MHz,D <sub>2</sub> O) for compound ZYZ-488.....                                        | 3  |
| Figure S2. <sup>13</sup> C NMR(150MHz,D <sub>2</sub> O) for compound ZYZ-488 .....                                      | 4  |
| Figure S3. <sup>1</sup> H NMR(400MHz, CDCl <sub>3</sub> ) for compound 7.....                                           | 5  |
| Figure S4. <sup>13</sup> C NMR(100MHz, CDCl <sub>3</sub> ) for compound 7.....                                          | 6  |
| Figure S5. <sup>1</sup> H NMR (400MHz, D <sub>2</sub> O) for compound 8.....                                            | 7  |
| Figure S6. <sup>13</sup> C NMR (150MHz, CDOD <sub>3</sub> ) for compound 8.....                                         | 8  |
| Figure S7. The effect of ZYZ-488 on expression of Apaf-1 under normoxic or hypoxic condition. ....                      | 9  |
| Figure S8. Effect of ZYZ-488 on CHK-2 phosphorylation and activation of caspase-8.10                                    |    |
| Figure S9. Silencing effect of siApaf-1.....                                                                            | 10 |

#### **Table S1. The predicted target candidates for kinases of compound ZYZ-488 using PharmMapper server<sup>[1]</sup>**

Note that in silico targets screening was performed within an in-house pharmacophore database, named PharmTarget DB, which contains more than 7000 receptor-based pharmacophore models, and only those kinases at the top 300 (about 9%) in the ranked list were extracted and summarized.

| Rank <sup>a</sup> | PDB | Target | Fit | Normalized | Molecular and pharmacophore |
|-------------------|-----|--------|-----|------------|-----------------------------|
|-------------------|-----|--------|-----|------------|-----------------------------|

| ID               | Name | Score | Fit Score | Aligned Model <sup>b</sup> |
|------------------|------|-------|-----------|----------------------------|
| Compound ZYZ-488 |      |       |           |                            |

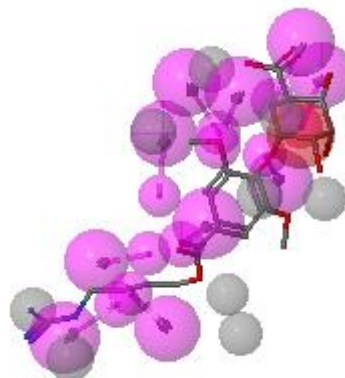

|    |      |        |       |        |
|----|------|--------|-------|--------|
| 22 | 1Z6T | APAF-1 | 4.476 | 0.4069 |
|----|------|--------|-------|--------|

<sup>a</sup> The ranked list of hit target pharmacophore models, which are sorted by fit score in descending order;

<sup>b</sup> The molecule and pharmacophore were aligned by PharmMapper, and the molecule-pharmacophore alignment poses were displayed via a modified version of Jmol applet. The pharmacophore features are schemed by color: Hydrophobic, cyan; Positive, blue; Negative, red; Donor, green, Acceptor, magenta; Aromatic, yellow;

<sup>c</sup> The result for compound 2 can be freely accessed and downloaded from the PharmMapper server via

[http://59.78.96.61/pharmmapper/result.php?job\\_id=14099133002](http://59.78.96.61/pharmmapper/result.php?job_id=14099133002)

1. Liu, X., et al, *PharmMapper server: a web server for potential drug target identification using pharmacophore mapping approach*. Nucleic acids research, 2010. **38**(suppl 2): p. W609-W614.

Figure S1. <sup>1</sup>H NMR(600MHz,D<sub>2</sub>O) for compound ZYZ-488

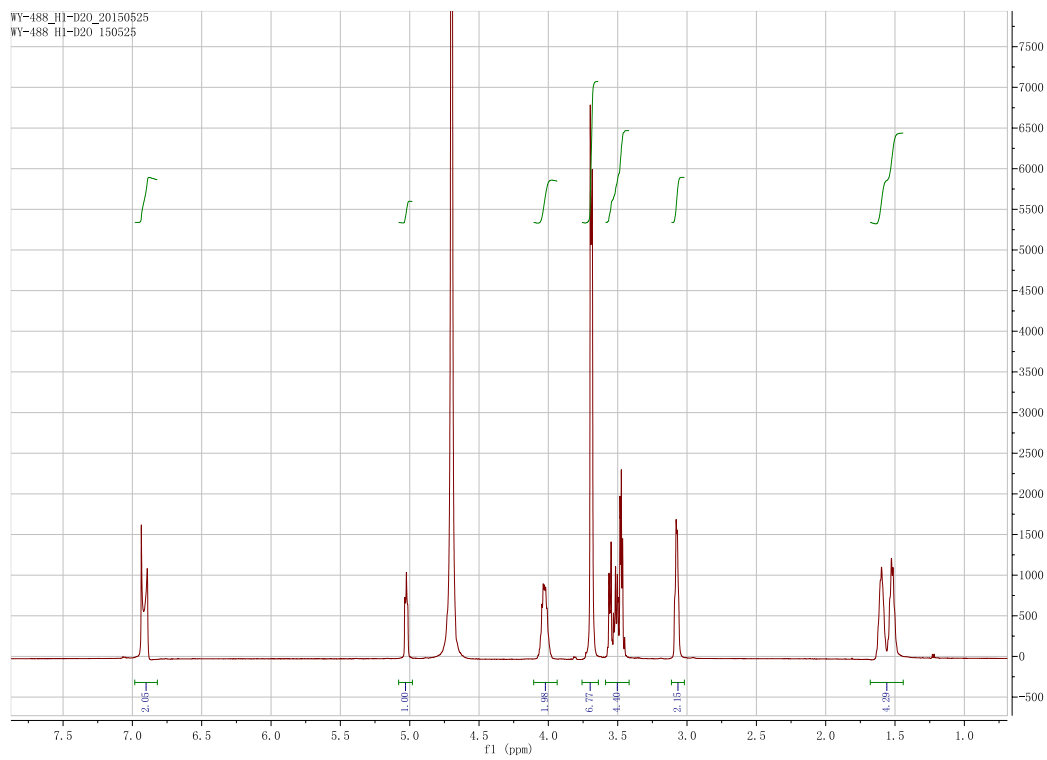

**Figure S2.**  $^{13}\text{C}$  NMR(150MHz, $\text{D}_2\text{O}$ ) for compound ZYZ-488

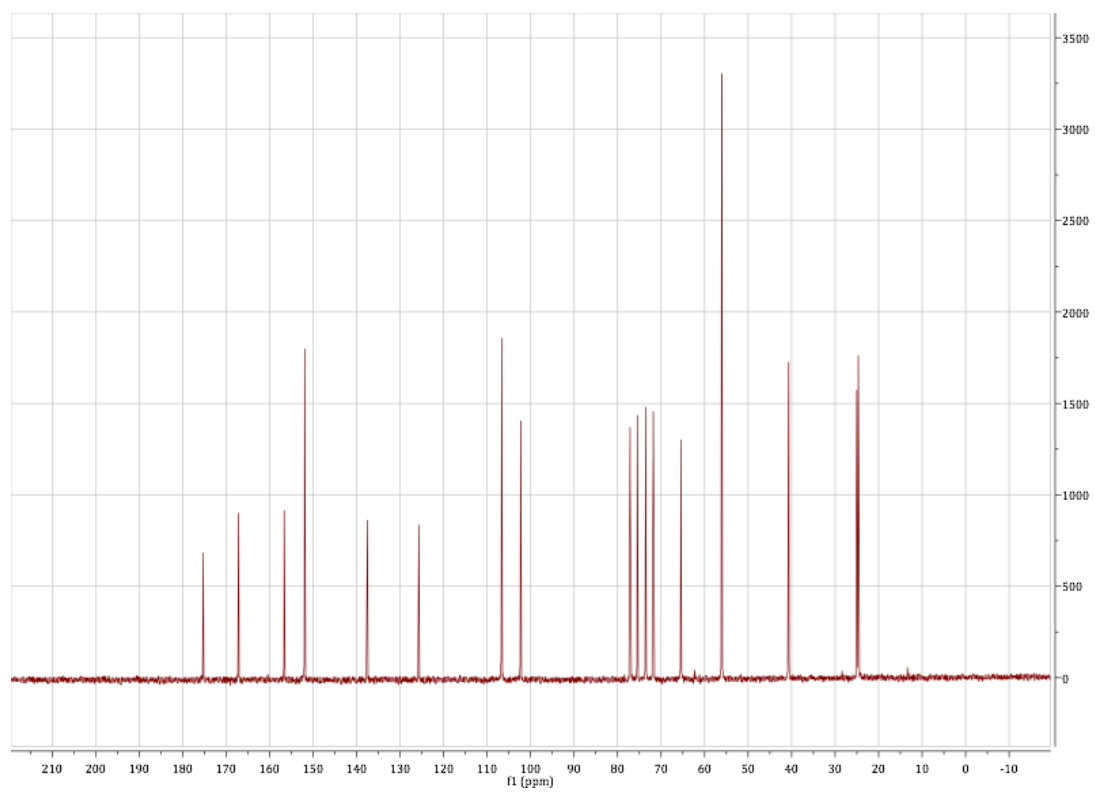

Figure S3.  $^1\text{H}$  NMR(400MHz,  $\text{CDCl}_3$ ) for compound 7

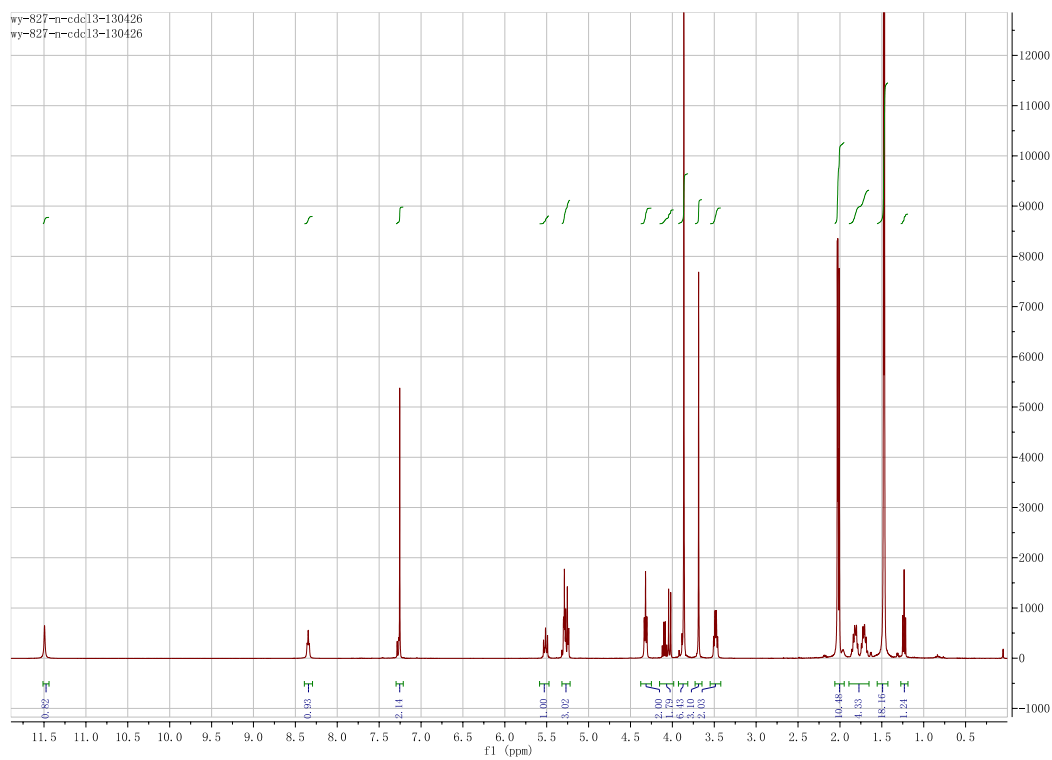

Figure S4.  $^{13}\text{C}$  NMR(100MHz,  $\text{CDCl}_3$ ) for compound 7

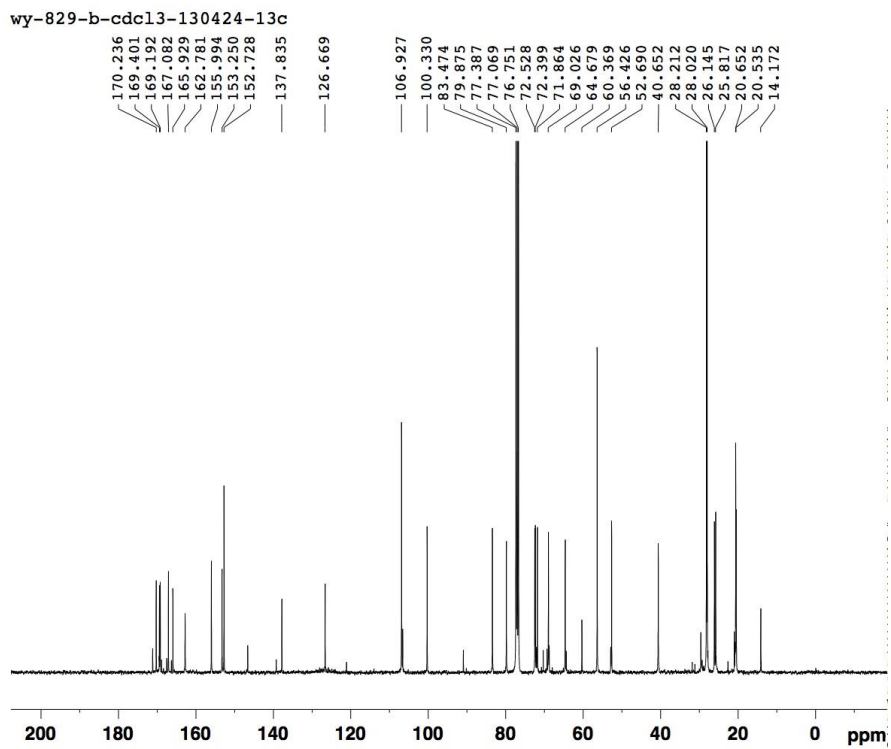

Figure S5.  $^1\text{H}$  NMR (400MHz,  $\text{D}_2\text{O}$ ) for compound 8

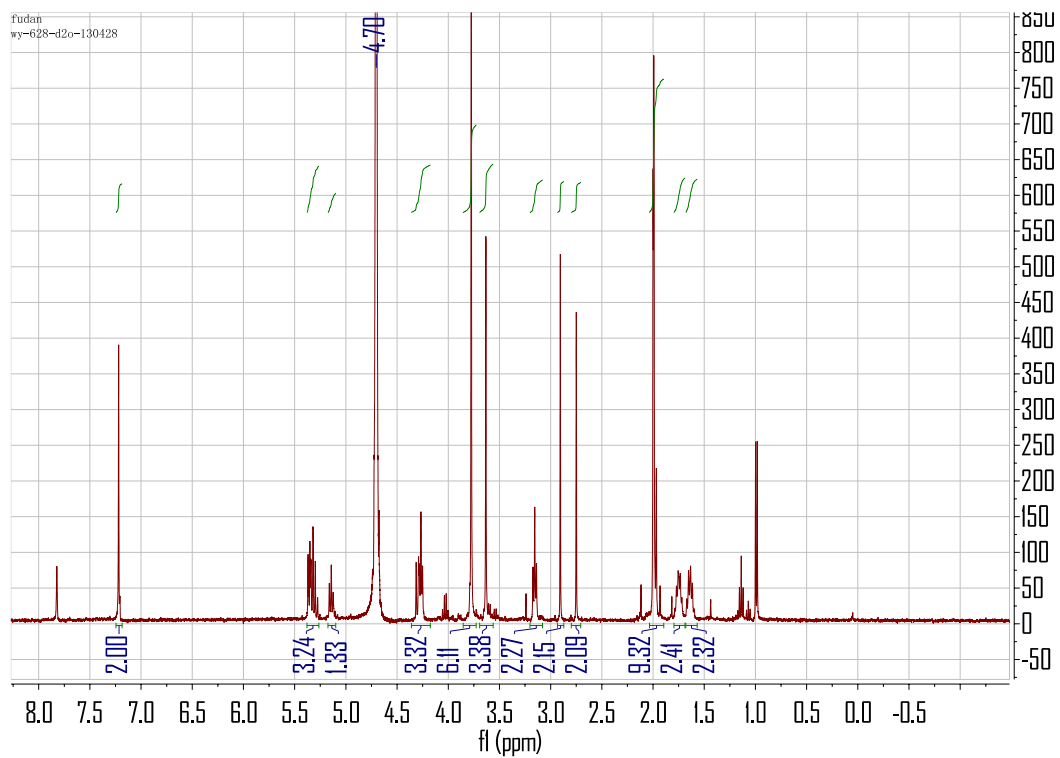

Figure S6.  $^{13}\text{C}$  NMR (150MHz,  $\text{CDOD}_3$ ) for compound 8

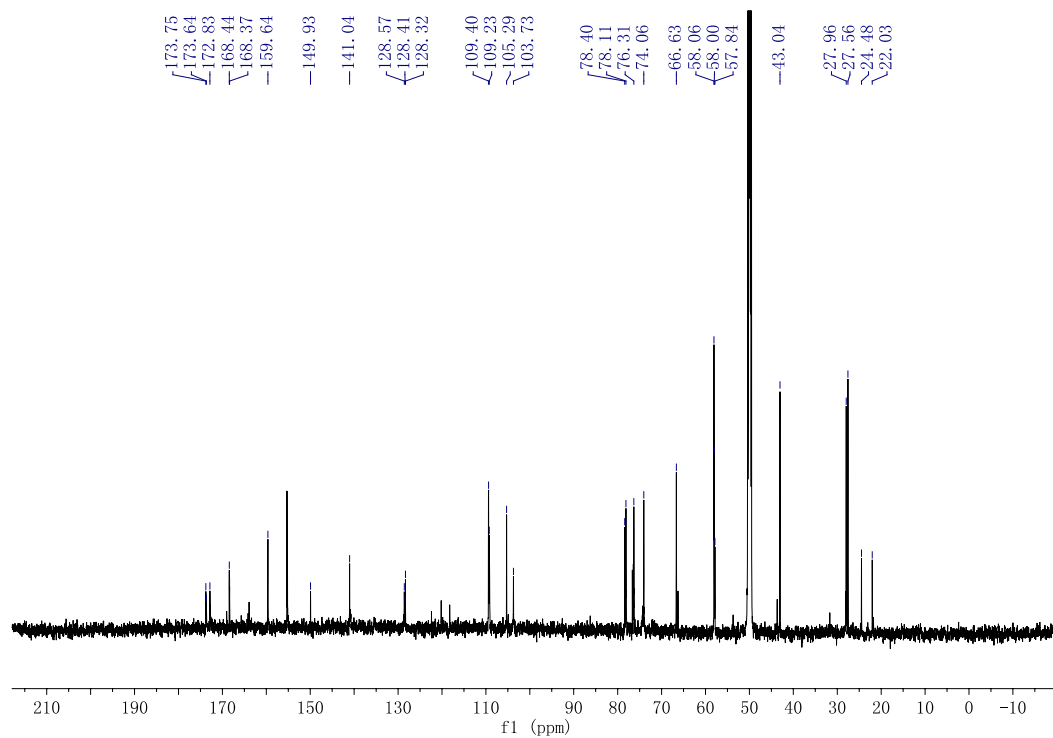



**Figure S7. The effect of ZYZ-488 on expression of Apaf-1 under normoxic or hypoxic condition.**

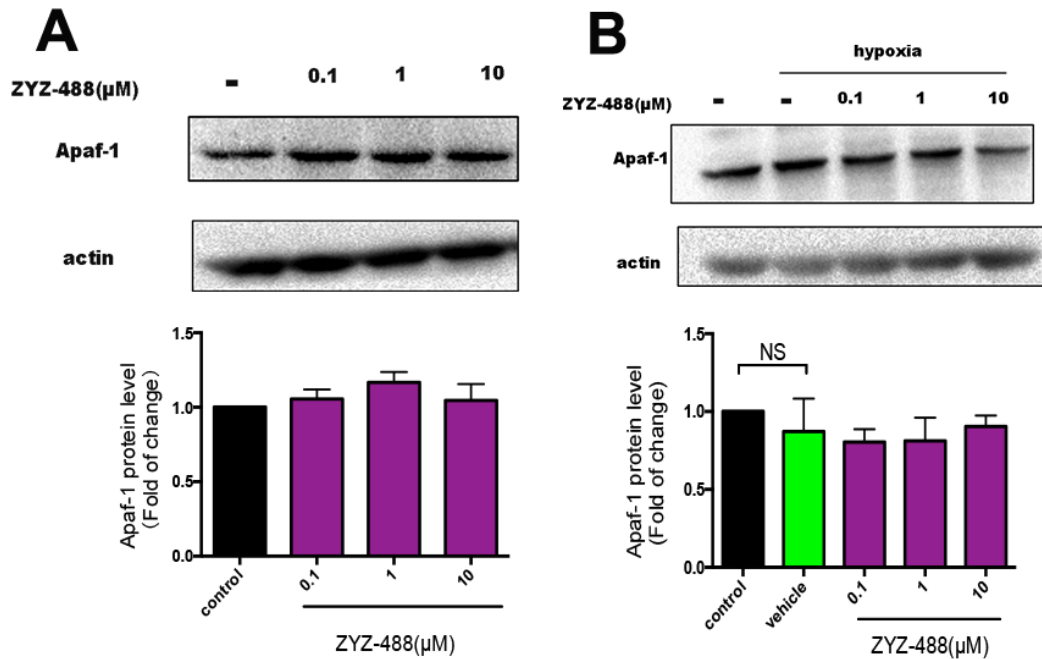

**Figure S7. The effect of ZYZ-488 on expression of Apaf-1 under normoxic or hypoxic condition.**

H9c2 cells were incubated with indicated concentrations of **ZYZ-488** for 12 h. Then Apaf-1 protein level under normoxic condition was analyzed by Western blot (A). H9c2 cells were culture under hypoxic condition for another 12h to analyze the Apaf-1 protein level under hypoxic condition. Data are the mean  $\pm$ S.E.M of results from at least three independent experiments.

Figure S8. Effect of ZYZ-488 on CHK-2 phosphorylation and activation of caspase-8.

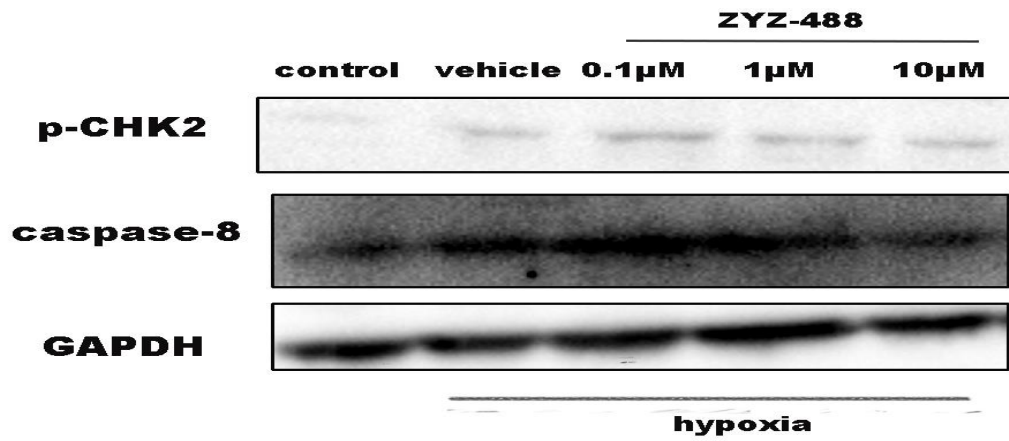

Figure S9. Silencing effect of siApaf-1

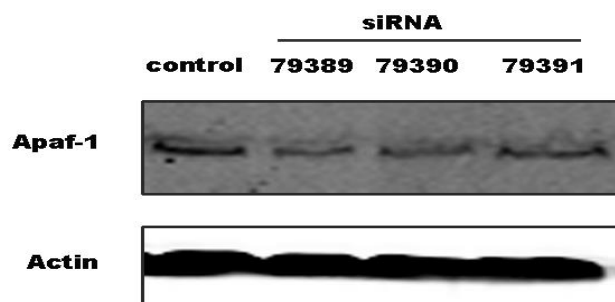



Figure S11. The full-length blots of figure 9.

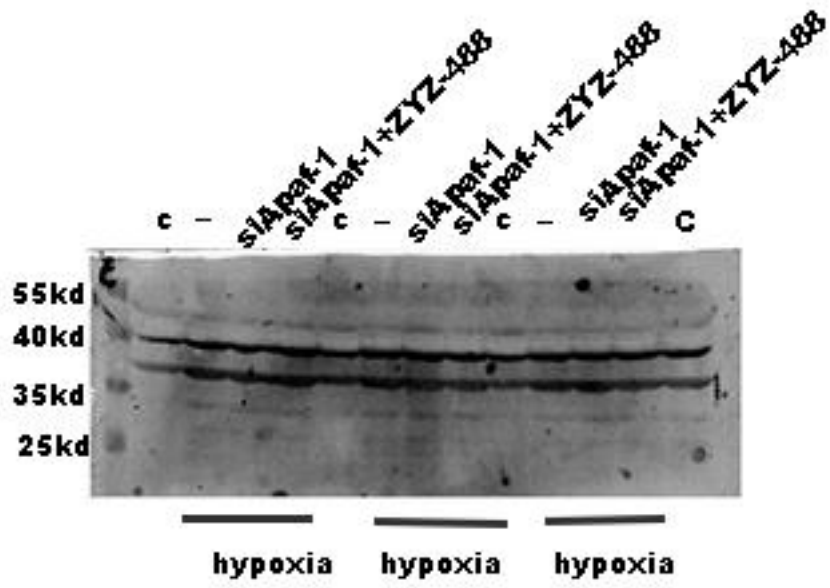

Figure S12. The full-length blots of figure S7 and S8.

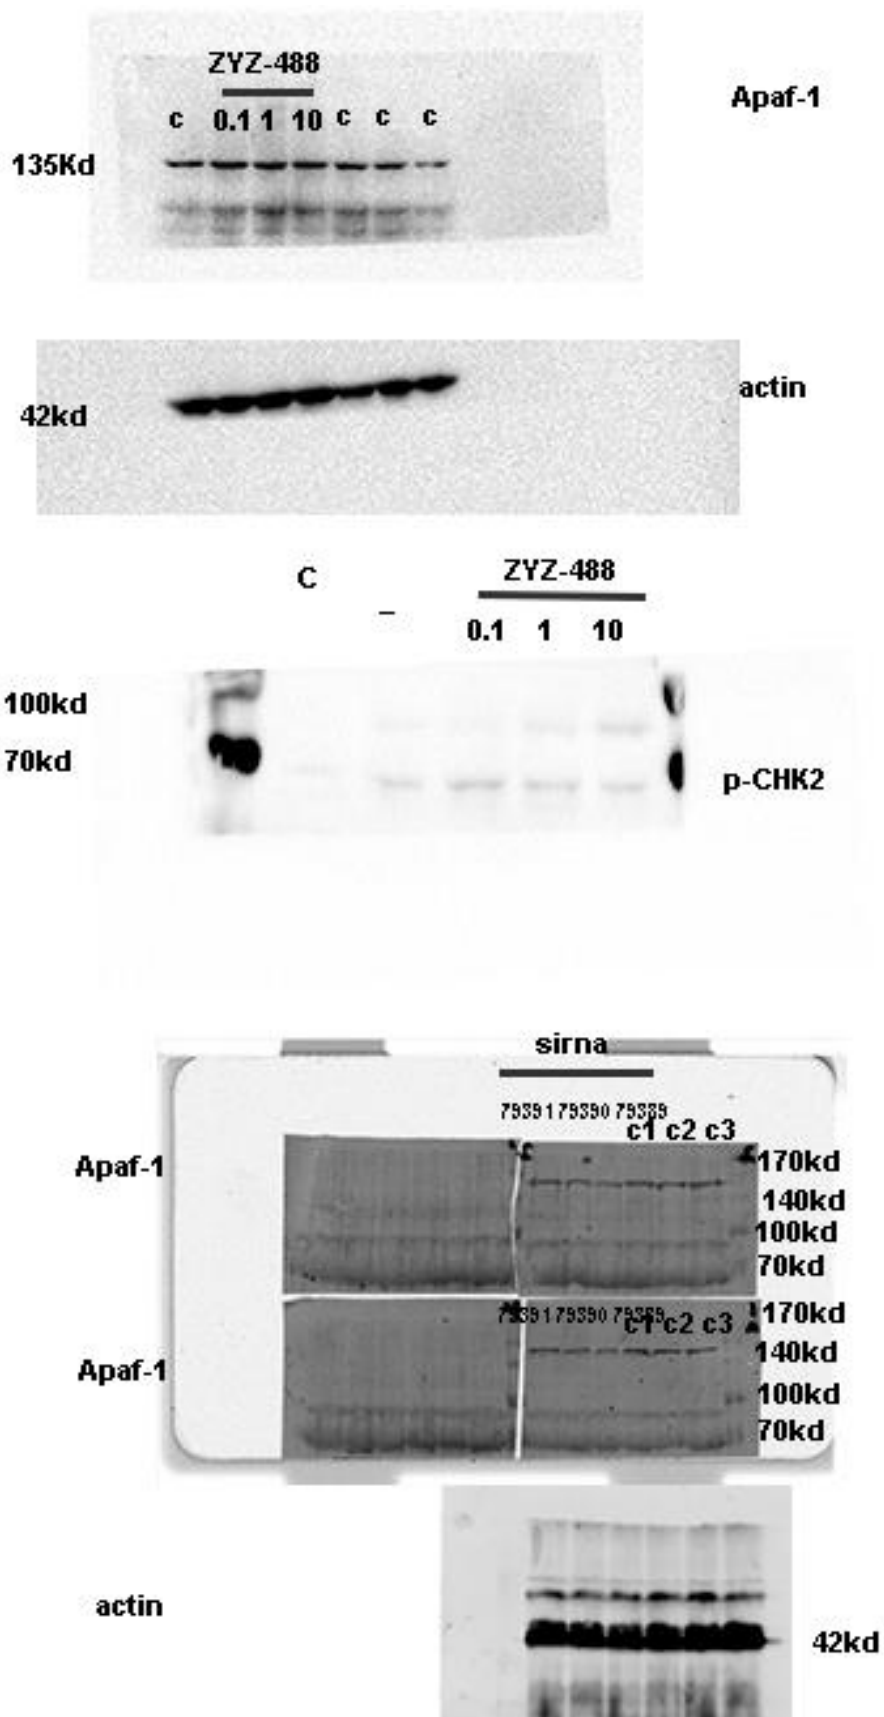

Supplement: srep29820-s1.pdf [file srep29820-s1.pdf]
